# Supplementary material for: Effects of COVID-19 pandemic on mental health among frontline healthcare workers: A systematic review and meta-analysis
Source: Frontiers journal article supplement (doi:10.3389/fpsyg.2022.1096857), 2023-01-27
Supplement: Data_Sheet_1.PDF [file Data_Sheet_1.PDF]

## Supplemental Material Content

**eTable 1.** Modified Newcastle-Ottawa risk of bias scoring guide.

**eTable 2.** Newcastle-Ottawa Risk of Bias Assessment.

**eTable 3.** Sensitivity Analysis of the Prevalence of Insomnia or Insomnia Symptoms Among Frontline Healthcare Workers During the COVID-19 Pandemic.

**eTable 4.** Sensitivity Analysis of the Prevalence of Stress or Stress Symptoms Among Frontline Healthcare Workers During the COVID-19 Pandemic.

**eTable 5.** Sensitivity Analysis of the Prevalence of Anxiety or Anxiety Symptoms Among Frontline Healthcare Workers During the COVID-19 Pandemic.

**eTable 6.** Sensitivity Analysis of the Prevalence of Depression or Depressive Symptoms Among Frontline Healthcare Workers During the COVID-19 Pandemic.

**eTable 7.** Sensitivities and Specificities of Commonly Used Instruments for Diagnosing Insomnia, Stress, Anxiety, and Depression.

**eFigure 1.** Assessment of Small Study Effects by Funnel Plot for the 16 Studies Reporting on Insomnia or Insomnia Symptoms Prevalence.

**eFigure 2.** Assessment of Small Study Effects by Funnel Plot for the 10 Studies Reporting on Stress or Stress Symptoms Prevalence.

**eFigure 3.** Assessment of Small Study Effects by Funnel Plot for the 19 Studies Reporting on Anxiety or Anxiety Symptoms Prevalence.

**eFigure 4.** Assessment of Small Study Effects by Funnel Plot for the 19 Studies Reporting on Depression or Depressive Symptoms Prevalence.

**eTable 1.** Modified Newcastle-Ottawa risk of bias scoring guide.

|                                                            |                                                                                                                                                                                                                                  |
|------------------------------------------------------------|----------------------------------------------------------------------------------------------------------------------------------------------------------------------------------------------------------------------------------|
| Sample representativeness                                  |                                                                                                                                                                                                                                  |
| 1 point                                                    | Population contained multiple hospitals in multiple regions.                                                                                                                                                                     |
| 0 points                                                   | Population contained either a single hospital, a single regions, or both.                                                                                                                                                        |
| Sample size                                                |                                                                                                                                                                                                                                  |
| 1 point                                                    | Sample size was greater than or equal to 200 participants.                                                                                                                                                                       |
| 0 points                                                   | Sample size was less than 200 participants.                                                                                                                                                                                      |
| Non-respondents                                            |                                                                                                                                                                                                                                  |
| 1 point                                                    | Comparability between respondent and non-respondent characteristics was established with a satisfactory response rate.                                                                                                           |
| 0 points                                                   | The comparability between respondents and non-respondents was unsatisfactory, the response rate was unsatisfactory, or there was no description of the response rate or the characteristics of the responders or non-responders. |
| Ascertainment of insomnia, stress, anxiety, and depression |                                                                                                                                                                                                                                  |
| 1 point                                                    | The study employed a commonly used measurement tool with a valid cutoff score.                                                                                                                                                   |
| 0 points                                                   | The study employed an infrequently used measurement tool, a commonly used measurement tool with an invalid cutoff score, or any tool with published sensitivity/specificity values <70%.                                         |
| Quality of descriptive statistics reporting                |                                                                                                                                                                                                                                  |
| 1 point                                                    | The study reported descriptive statistics to describe the population (e.g., age, sex, class year) with proper measures of dispersion.                                                                                            |
| 0 points                                                   | The study did not report descriptive statistics, incompletely reported descriptive statistics, or did not report measures of dispersion.                                                                                         |

**eTable 2.** Newcastle-Ottawa Risk of Bias Assessment.

| <b>First Author, Year</b>              | <b>Representativeness</b> | <b>size</b> | <b>Comparability</b> | <b>Outcome</b> | <b>Statistics</b> | <b>Total</b> |
|----------------------------------------|---------------------------|-------------|----------------------|----------------|-------------------|--------------|
| Almater et al, <sup>1</sup> 2020       | 0                         | 0           | 0                    | 1              | 1                 | 2            |
| Alshekaili et al, <sup>2</sup> 2020    | 1                         | 0           | 1                    | 1              | 0                 | 3            |
| Cui et al, <sup>3</sup> 2020           | 0                         | 1           | 1                    | 1              | 0                 | 3            |
| Elkholy et al, <sup>4</sup> 2020       | 1                         | 1           | 1                    | 1              | 0                 | 4            |
| Giardino et al, <sup>5</sup> 2020      | 1                         | 1           | 0                    | 0              | 0                 | 2            |
| Haravuori et al, <sup>6</sup> 2020     | 1                         | 1           | 0                    | 0              | 0                 | 2            |
| Lai et al, <sup>7</sup> 2020           | 1                         | 1           | 1                    | 1              | 1                 | 5            |
| Liu et al, <sup>8</sup> 2020           | 0                         | 1           | 0                    | 1              | 0                 | 2            |
| Magnavita et al, <sup>9</sup> 2020     | 1                         | 0           | 0                    | 1              | 0                 | 2            |
| Shechter et al, <sup>10</sup> 2020     | 1                         | 1           | 0                    | 1              | 0                 | 3            |
| Tiete et al, <sup>11</sup> 2020        | 1                         | 0           | 1                    | 1              | 0                 | 3            |
| Wang et al, <sup>12</sup> 2020         | 1                         | 1           | 1                    | 1              | 0                 | 4            |
| Youssef et al, <sup>13</sup> 2020      | 1                         | 1           | 1                    | 1              | 1                 | 5            |
| Azoulay et al, <sup>14</sup> 2021      | 1                         | 1           | 1                    | 1              | 0                 | 4            |
| Di Mattei et al, <sup>15</sup> 2021    | 1                         | 1           | 0                    | 1              | 0                 | 3            |
| Fiol-DeRoque et al, <sup>16</sup> 2021 | 1                         | 0           | 1                    | 1              | 1                 | 4            |
| Guo et al, <sup>17</sup> 2021          | 1                         | 0           | 1                    | 1              | 1                 | 4            |
| Lee et al, <sup>18</sup> 2021          | 1                         | 0           | 1                    | 1              | 0                 | 4            |
| Wright et al, <sup>19</sup> 2021       | 0                         | 1           | 0                    | 1              | 0                 | 2            |

**eTable 3.** Sensitivity Analysis of the Prevalence of Insomnia or Insomnia Symptoms Among Frontline Healthcare Workers During the COVID-19 Pandemic.

| First Author, Year                             | Prevalence (%) | 95% CI |       | Tau <sup>2</sup> | I <sup>2</sup> |
|------------------------------------------------|----------------|--------|-------|------------------|----------------|
|                                                |                | Lower  | Upper |                  |                |
| Omitted Almater et al, <sup>1</sup> 2020       | 45.9           | 45.1   | 46.7  | 0.68             | 99%            |
| Omitted Alshekaili et al, <sup>2</sup> 2020    | 46.8           | 46.0   | 47.6  | 0.60             | 99%            |
| Omitted Cui et al, <sup>3</sup> 2020           | 45.9           | 45.1   | 46.7  | 0.68             | 99%            |
| Omitted Elkholy et al, <sup>4</sup> 2020       | 46.4           | 45.6   | 47.2  | 0.66             | 99%            |
| Omitted Giardino et al, <sup>5</sup> 2020      | 43.8           | 43.0   | 44.6  | 0.55             | 99%            |
| Omitted Haravuori et al, <sup>6</sup> 2020     | 46.3           | 45.3   | 47.2  | 0.68             | 99%            |
| Omitted Lai et al, <sup>7</sup> 2020           | 46.9           | 46.1   | 47.7  | 0.67             | 99%            |
| Omitted Liu et al, <sup>8</sup> 2020           | 47.7           | 46.9   | 48.6  | 0.67             | 99%            |
| Omitted Magnavita et al, <sup>9</sup> 2020     | 46.1           | 45.3   | 47.1  | 0.61             | 99%            |
| Omitted Tiete et al, <sup>11</sup> 2020        | 44.9           | 44.1   | 45.7  | 0.59             | 99%            |
| Omitted Wang et al, <sup>12</sup> 2020         | 46.3           | 45.5   | 47.1  | 59.4             | 99%            |
| Omitted Youssef et al, <sup>13</sup> 2020      | 45.6           | 44.8   | 46.4  | 0.67             | 99%            |
| Omitted Di Mattei et al, <sup>15</sup> 2021    | 45.4           | 44.6   | 46.2  | 0.67             | 99%            |
| Omitted Fiol-DeRoque et al, <sup>16</sup> 2021 | 46.5           | 45.7   | 47.3  | 0.64             | 99%            |
| Omitted Guo et al, <sup>17</sup> 2021          | 43.4           | 42.5   | 44.2  | 48.8             | 99%            |
| Omitted Lee et al, <sup>18</sup> 2021          | 46.1           | 45.3   | 46.9  | 0.67             | 99%            |

**eTable 4.** Sensitivity Analysis of the Prevalence of Stress or Stress Symptoms Among Front-line Healthcare Workers During the COVID-19 Pandemic.

| First Author, Year                             | Prevalence (%) | 95% CI |       | Tau <sup>2</sup> | I <sup>2</sup> |
|------------------------------------------------|----------------|--------|-------|------------------|----------------|
|                                                |                | Lower  | Upper |                  |                |
| Omitted Almater et al, <sup>1</sup> 2020       | 54.6           | 53.4   | 55.9  | 0.58             | 99%            |
| Omitted Alshekaili et al, <sup>2</sup> 2020    | 57.9           | 56.6   | 59.3  | 0.49             | 98%            |
| Omitted Elkholy et al, <sup>4</sup> 2020       | 52.4           | 51.1   | 53.7  | 0.40             | 98%            |
| Omitted Lai et al, <sup>7</sup> 2020           | 50.5           | 49.1   | 52.0  | 0.58             | 98%            |
| Omitted Magnavita et al, <sup>9</sup> 2020     | 55.3           | 54.0   | 56.6  | 0.63             | 99%            |
| Omitted Shechter et al, <sup>10</sup> 2020     | 54.7           | 53.4   | 56.0  | 0.66             | 99%            |
| Omitted Tiete et al, <sup>11</sup> 2020        | 56.7           | 55.4   | 58.1  | 0.62             | 99%            |
| Omitted Youssef et al, <sup>13</sup> 2020      | 56.7           | 55.4   | 58.0  | 0.60             | 99%            |
| Omitted Di Mattei et al, <sup>15</sup> 2021    | 53.7           | 52.3   | 55.1  | 0.65             | 99%            |
| Omitted Fiol-DeRoque et al, <sup>16</sup> 2021 | 56.2           | 54.9   | 57.6  | 0.62             | 99%            |

**eTable 5.** Sensitivity Analysis of the Prevalence of Anxiety or Anxiety Symptoms Among Frontline Healthcare Workers During the COVID-19 Pandemic.

| First Author, Year                             | Prevalence (%) | 95% CI |       | Tau <sup>2</sup> | I <sup>2</sup> |
|------------------------------------------------|----------------|--------|-------|------------------|----------------|
|                                                |                | Lower  | Upper |                  |                |
| Omitted Almater et al, <sup>1</sup> 2020       | 38.2           | 37.5   | 38.9  | 0.69             | 99%            |
| Omitted Alshekaili et al, <sup>2</sup> 2020    | 38.2           | 37.5   | 39.0  | 0.69             | 99%            |
| Omitted Cui et al, <sup>3</sup> 2020           | 37.9           | 37.1   | 38.6  | 0.67             | 99%            |
| Omitted Elkholy et al, <sup>4</sup> 2020       | 37.0           | 36.3   | 37.8  | 0.55             | 99%            |
| Omitted Giardino et al, <sup>5</sup> 2020      | 35.7           | 34.9   | 36.4  | 0.55             | 99%            |
| Omitted Haravuori et al, <sup>6</sup> 2020     | 45.6           | 44.7   | 46.5  | 0.62             | 99%            |
| Omitted Lai et al, <sup>7</sup> 2020           | 37.7           | 37.0   | 38.5  | 0.69             | 99%            |
| Omitted Liu et al, <sup>8</sup> 2020           | 39.6           | 38.8   | 40.4  | 0.67             | 99%            |
| Omitted Magnavita et al, <sup>9</sup> 2020     | 38.4           | 37.7   | 39.2  | 0.59             | 99%            |
| Omitted Shechter et al, <sup>10</sup> 2020     | 38.4           | 37.7   | 39.2  | 0.68             | 99%            |
| Omitted Tiete et al, <sup>11</sup> 2020        | 37.7           | 36.9   | 38.4  | 0.68             | 99%            |
| Omitted Wang et al, <sup>12</sup> 2020         | 38.6           | 37.9   | 39.3  | 0.57             | 99%            |
| Omitted Youssef et al, <sup>13</sup> 2020      | 38.1           | 37.3   | 38.8  | 0.69             | 99%            |
| Omitted Azoulay et al, <sup>14</sup> 2021      | 37.1           | 36.3   | 37.8  | 0.66             | 99%            |
| Omitted Di Mattei et al, <sup>15</sup> 2021    | 38.6           | 37.9   | 39.4  | 0.68             | 99%            |
| Omitted Fiol-DeRoque et al, <sup>16</sup> 2021 | 37.8           | 37.1   | 38.6  | 0.68             | 99%            |
| Omitted Guo et al, <sup>17</sup> 2021          | 37.2           | 36.5   | 38.0  | 0.68             | 99%            |
| Omitted Lee et al, <sup>18</sup> 2021          | 37.8           | 37.1   | 38.6  | 0.68             | 99%            |
| Omitted Wright et al, <sup>19</sup> 2021       | 38.3           | 37.6   | 39.0  | 0.65             | 99%            |

**eTable 6.** Sensitivity Analysis of the Prevalence of Depression or Depressive Symptoms Among Frontline Healthcare Workers During the COVID-19 Pandemic.

| First Author, Year                             | Prevalence (%) | 95% CI |       | Tau <sup>2</sup> | I <sup>2</sup> |
|------------------------------------------------|----------------|--------|-------|------------------|----------------|
|                                                |                | Lower  | Upper |                  |                |
| Omitted Almater et al, <sup>1</sup> 2020       | 43.8           | 43.0   | 44.5  | 0.72             | 99%            |
| Omitted Alshekaili et al, <sup>2</sup> 2020    | 44.1           | 43.4   | 44.9  | 0.72             | 99%            |
| Omitted Cui et al, <sup>3</sup> 2020           | 43.5           | 42.7   | 44.2  | 0.70             | 99%            |
| Omitted Elkholy et al, <sup>4</sup> 2020       | 42.7           | 42.0   | 43.5  | 0.58             | 99%            |
| Omitted Giardino et al, <sup>5</sup> 2020      | 41.3           | 40.6   | 42.1  | 0.55             | 98%            |
| Omitted Haravuori et al, <sup>6</sup> 2020     | 48.5           | 47.6   | 49.4  | 0.71             | 98%            |
| Omitted Lai et al, <sup>7</sup> 2020           | 43.3           | 42.5   | 44.1  | 0.72             | 99%            |
| Omitted Liu et al, <sup>8</sup> 2020           | 44.1           | 43.4   | 44.9  | 0.73             | 99%            |
| Omitted Magnavita et al, <sup>9</sup> 2020     | 43.9           | 42.2   | 44.7  | 0.70             | 99%            |
| Omitted Shechter et al, <sup>10</sup> 2020     | 43.6           | 42.9   | 44.4  | 0.73             | 99%            |
| Omitted Tiete et al, <sup>11</sup> 2020        | 43.4           | 42.7   | 44.2  | 0.72             | 99%            |
| Omitted Wang et al, <sup>12</sup> 2020         | 44.3           | 43.5   | 45.0  | 0.61             | 99%            |
| Omitted Youssef et al, <sup>13</sup> 2020      | 43.3           | 42.6   | 44.1  | 0.70             | 99%            |
| Omitted Azoulay et al, <sup>14</sup> 2021      | 44.2           | 43.4   | 45.0  | 0.72             | 99%            |
| Omitted Di Mattei et al, <sup>15</sup> 2021    | 41.1           | 43.3   | 44.8  | 0.73             | 99%            |
| Omitted Fiol-DeRoque et al, <sup>16</sup> 2021 | 43.8           | 43.1   | 44.6  | 0.73             | 99%            |
| Omitted Guo et al, <sup>17</sup> 2021          | 43.0           | 42.2   | 43.7  | 0.71             | 99%            |
| Omitted Lee et al, <sup>18</sup> 2021          | 44.5           | 43.8   | 45.3  | 0.58             | 99%            |
| Omitted Wright et al, <sup>19</sup> 2021       | 43.9           | 43.2   | 44.7  | 0.66             | 99%            |

**eTable 7.** Sensitivities and Specificities of Commonly Used Instruments for Diagnosing Insomnia, Stress, Anxiety, and Depression.

| Instrument             | Cutoff | Sensitivity (%) | Specificity (%) |
|------------------------|--------|-----------------|-----------------|
| Insomnia               |        |                 |                 |
| ISI <sup>20</sup>      | ≥8     | 99 (97 to 100)  | 92 (89 to 95)   |
| PSQI <sup>21</sup>     | ≥6     | 100 (83 to 100) | 49 (36 to 63)   |
| ESS <sup>21</sup>      | ≥10    | 76 (63 to 86)   | 20 (6 to 44)    |
| Stress                 |        |                 |                 |
| PSS-10 <sup>22</sup>   | ≥9     | 83 (81 to 88)   | 75 (72 to 81)   |
| IES-R <sup>22</sup>    | ≥18    | 86 (67 to 94)   | 83 (76 to 88)   |
| ERI <sup>23</sup>      | ≥2     | 73 (59 to 93)   | 89 (85 to 99)   |
| PC-PTSD <sup>24</sup>  | ≥3     | 57 (45 to 68)   | 77 (67 to 82)   |
| Anxiety                |        |                 |                 |
| GAD-2 <sup>25</sup>    | ≥3     | 73 (39 to 94)   | 83 (76 to 89)   |
| GAD-7 <sup>25</sup>    | ≥10    | 64 (31 to 89)   | 86 (78 to 91)   |
| OASIS <sup>25</sup>    | ≥8     | 82 (48 to 98)   | 82 (75 to 88)   |
| HADS-A <sup>25</sup>   | ≥8     | 90 (85 to 93)   | 78 (69 to 85)   |
| Depression             |        |                 |                 |
| BDI <sup>26</sup>      | ≥10    | 91 (86 to 96)   | 79 (52 to 100)  |
| CES-D <sup>26</sup>    | ≥16    | 84 (79 to 89)   | 74 (68 to 80)   |
| PRIME-MD <sup>26</sup> | ≥1     | 91 (81 to 100)  | 66 (48 to 84)   |
| GHQ <sup>26</sup>      | ≥4     | 86 (76 to 95)   | 66 (57 to 74)   |
| HADS-D <sup>26</sup>   | ≥11    | 69 (45 to 86)   | 86 (73 to 93)   |
| PHQ-9 <sup>26</sup>    | ≥10    | 88 (74 to 96)   | 88 (85 to 90)   |
| Zung-SDS <sup>26</sup> | ≥50    | 86 (73 to 100)  | 76 (57 to 95)   |
| HSCL <sup>26</sup>     | ≥43    | 82 (71 to 93)   | 73 (52 to 94)   |

Abbreviations: BDI, Beck Depression Inventory; CES-D, Center for Epidemiological Studies Depression; ESS Epworth sleepiness score; ERI, Effort Reward Imbalance; GAD-2, 2-item Generalized Anxiety Disorder Scal; GAD-7, Generalized Anxiety Disorder 7-item; GHQ, Primary Care Evaluation of Mental Disorders; HADS-A, Hospital Anxiety and Depression Scale-Anxiety Subscale; HADS-D, Hospital Anxiety and Depression Scale-Depression Subscale; HSCL, Hopkins Symptom Checklist; IES-R, 22-item Impact of Event Scale–Revised; ISI, The seven-item Insomnia Severity Index; OASIS, Overall Anxiety Severity and Impairment Scale; PC-PTSD, 4-item Primary Care PTSD screen; PHQ-9, Patient Health Questionnaire-9; PRIME-MD, Primary Care Evaluation of Mental Disorders; PSQI, Hospital Anxiety and Depression Scale; PSS-10, 10-item Perceived Stress Scale; Zung-SDS, Zung Self-Rating Depression Scale.



**eFigure 1.** Assessment of Small Study Effects by Funnel Plot for the 16 Studies Reporting on Insomnia or Insomnia Symptoms Prevalence

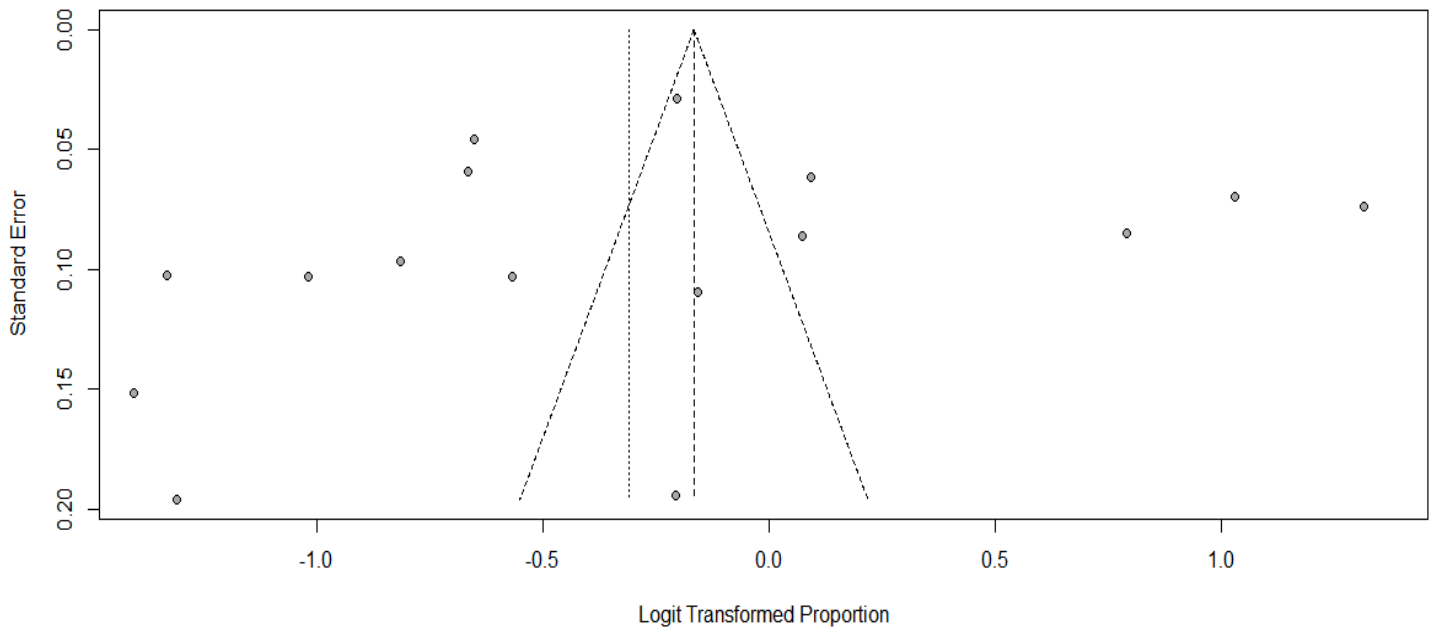

**eFigure 2.** Assessment of Small Study Effects by Funnel Plot for the 10 Studies Reporting on Stress or Stress Symptoms Prevalence

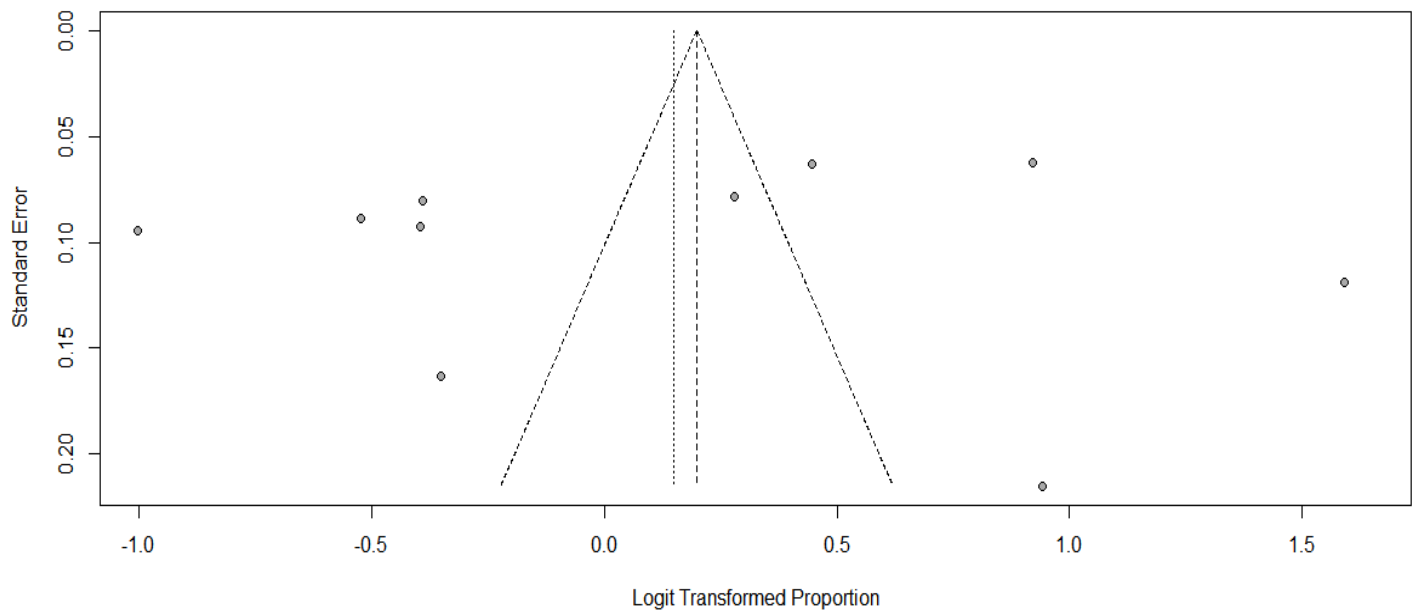

**eFigure 3.** Assessment of Small Study Effects by Funnel Plot for the 19 Studies Reporting on Anxiety or Anxiety Symptoms Prevalence

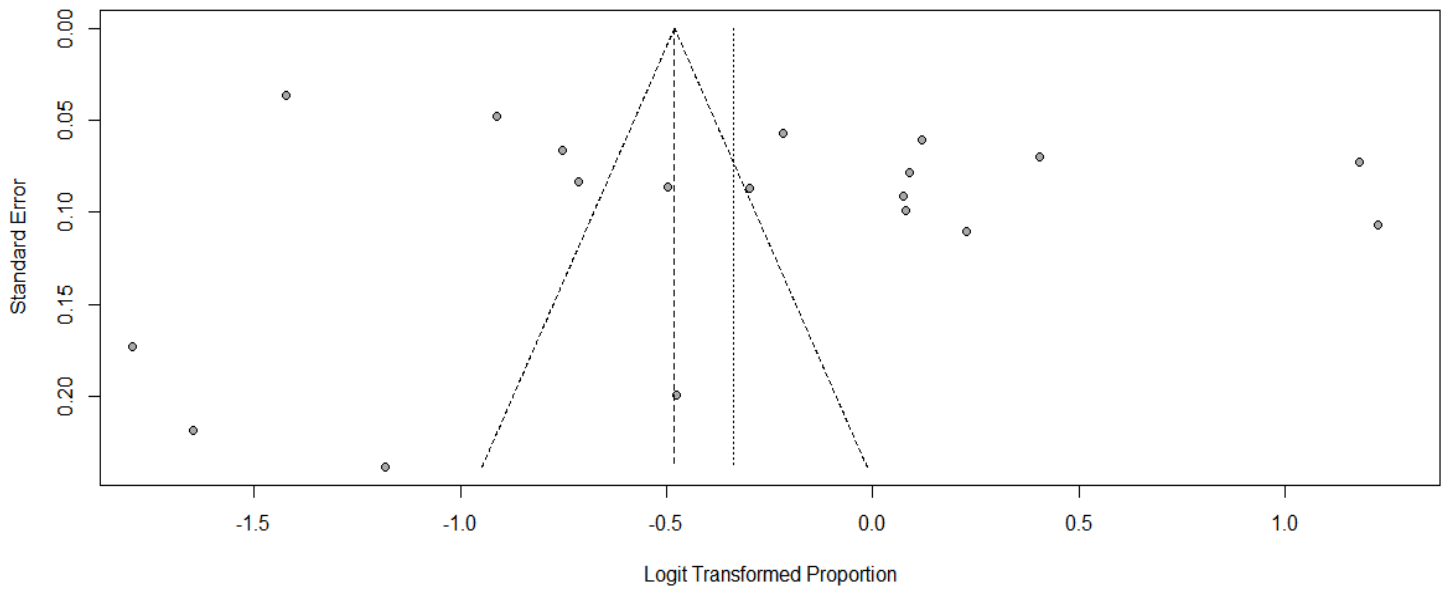

**eFigure 4.** Assessment of Small Study Effects by Funnel Plot for the 19 Studies Reporting on Depression or Depressive Symptoms Prevalence

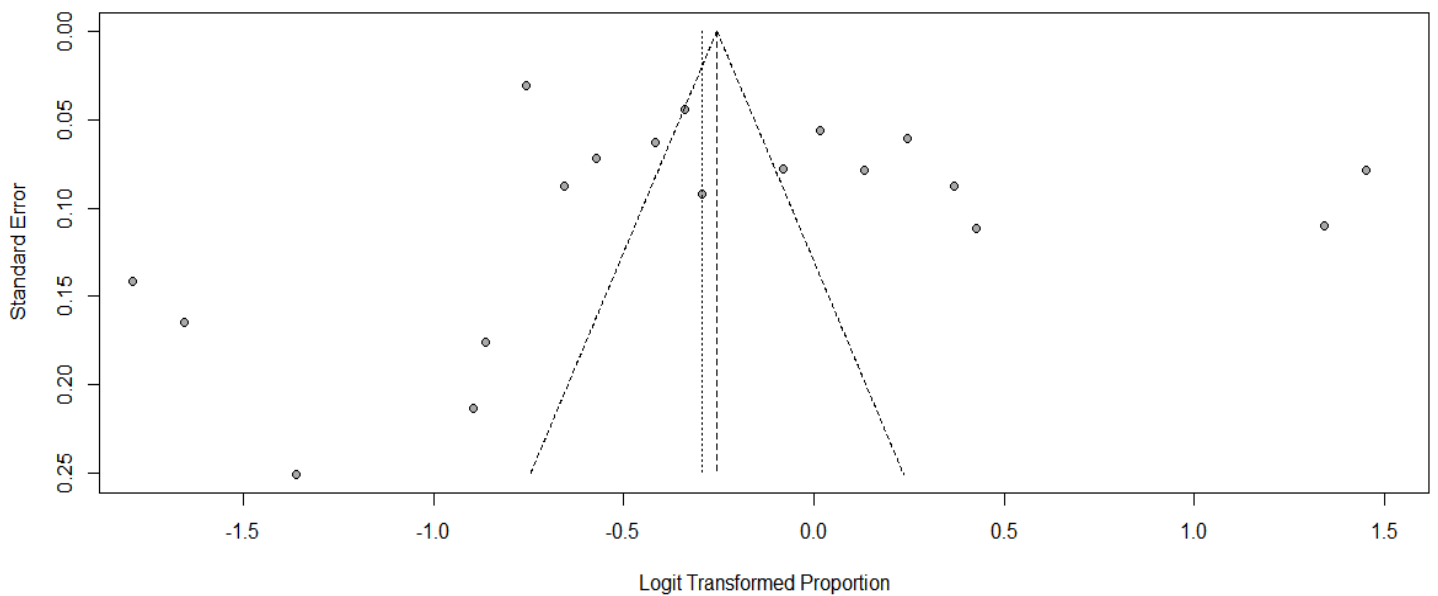

## References

1. Almater AI, Tobaigy MF, Younis AS, et al. Effect of 2019 Coronavirus Pandemic on Ophthalmologists Practicing in Saudi Arabia: A Psychological Health Assessment. *Middle East Afr J Ophthalmol*. 2020(27):79-85. doi:10.4103/meajo.MEAJO\_220\_20
2. Alshekaili M, Hassan W, Al Said N, et al. Factors associated with mental health outcomes across healthcare settings in Oman during COVID-19: frontline versus non-frontline healthcare workers. *BMJ Open*. 2020(10):e042030. doi:10.1136/bmjopen-2020-042030
3. Cui Q, Cai Z, Li J, et al. The Psychological Pressures of Breast Cancer Patients During the COVID-19 Outbreak in China-A Comparison With Frontline Female Nurses. *Front Psychiatry*. 2020(11):559701. doi:10.3389/fpsy.2020.559701
4. Elkholy H, Tawfik F, Ibrahim I, et al. Mental health of frontline healthcare workers exposed to COVID-19 in Egypt: A call for action. *Int J Soc Psychiatry*. 2021(67):522-31. doi:10.1177/0020764020960192
5. Giardino DL, Huck-Iriart C, Riddick M, et al. The endless quarantine: the impact of the COVID-19 outbreak on healthcare workers after three months of mandatory social isolation in Argentina. *Sleep Med*. 2020(76):16-25. doi:10.1016/j.sleep.2020.09.022
6. Haravuori H, Junttila K, Haapa T, et al. Personnel Well-Being in the Helsinki University Hospital during the COVID-19 Pandemic-A Prospective Cohort Study. *Int J Environ Res Public Health*. 2020(17) doi:10.3390/ijerph17217905
7. Lai J, Ma S, Wang Y, et al. Factors Associated With Mental Health Outcomes Among Health Care Workers Exposed to Coronavirus Disease 2019. *JAMA Netw Open*. 2020(3):e203976. doi:10.1001/jamanetworkopen.2020.3976
8. Liu T, Zheng Z, Sha X, et al. Psychological impact in non-infectious disease specialists who had direct contact with patients with COVID-19. *BJPsych Open*. 2020(7):e8. doi:10.1192/bjo.2020.147
9. Magnavita N, Soave PM, Ricciardi W, et al. Occupational Stress and Mental Health among Anesthetists during the COVID-19 Pandemic. *Int J Environ Res Public Health*. 2020(17) doi:10.3390/ijerph17218245
10. Shechter A, Diaz F, Moise N, et al. Psychological distress, coping behaviors, and preferences for support among New York healthcare workers during the COVID-19 pandemic. *Gen Hosp Psychiatry*. 2020(66):1-8. doi:10.1016/j.genhosppsych.2020.06.007
11. Tiete J, Guatteri M, Lachaux A, et al. Mental Health Outcomes in Healthcare Workers in COVID-19 and Non-COVID-19 Care Units: A Cross-Sectional Survey in Belgium. *Front Psychol*. 2020(11):612241. doi:10.3389/fpsyg.2020.612241
12. Wang LQ, Zhang M, Liu GM, et al. Psychological impact of coronavirus disease (2019) (COVID-19) epidemic on medical staff in different posts in China: A multicenter study. *J Psychiatr Res*. 2020(129):198-205. doi:10.1016/j.jpsychires.2020.07.008

13. Youssef N, Mostafa A, Ezzat R, et al. Mental health status of health-care professionals working in quarantine and non-quarantine Egyptian hospitals during the COVID-19 pandemic. *East Mediterr Health J.* 2020(26):1155-64. doi:10.26719/emhj.20.116
14. Azoulay E, Pochard F, Reignier J, et al. Symptoms of Mental Health Disorders in Critical Care Physicians Facing the Second COVID-19 Wave: A Cross-Sectional Study. *Chest.* 2021(160):944-55. doi:10.1016/j.chest.2021.05.023
15. Di Mattei VE, Perego G, Milano F, et al. The "Healthcare Workers' Wellbeing (Benessere Operatori)" Project: A Picture of the Mental Health Conditions of Italian Healthcare Workers during the First Wave of the COVID-19 Pandemic. *Int J Environ Res Public Health.* 2021(18) doi:10.3390/ijerph18105267
16. Fiol-DeRoque MA, Serrano-Ripoll MJ, Jiménez R, et al. A Mobile Phone-Based Intervention to Reduce Mental Health Problems in Health Care Workers During the COVID-19 Pandemic (PsyCovidApp): Randomized Controlled Trial. *JMIR Mhealth Uhealth.* 2021(9):e27039. doi:10.2196/27039
17. Guo WP, Min Q, Gu WW, et al. Prevalence of mental health problems in frontline healthcare workers after the first outbreak of COVID-19 in China: a cross-sectional study. *Health Qual Life Outcomes.* 2021(19):103. doi:10.1186/s12955-021-01743-7
18. Lee J, Lee HJ, Hong Y, et al. Risk Perception, Unhealthy Behavior, and Anxiety Due to Viral Epidemic Among Healthcare Workers: The Relationships With Depressive and Insomnia Symptoms During COVID-19. *Front Psychiatry.* 2021(12):615387. doi:10.3389/fpsyt.2021.615387
19. Wright HM, Griffin BJ, Shoji K, et al. Pandemic-related mental health risk among front line personnel. *J Psychiatr Res.* 2021(137):673-80. doi:10.1016/j.jpsychires.2020.10.045
20. Morin CM, Belleville G, Bédanger L, et al. The Insomnia Severity Index: psychometric indicators to detect insomnia cases and evaluate treatment response. *Sleep.* 2011(34):601-8. doi:10.1093/sleep/34.5.601
21. Alsaadi SM, McAuley JH, Hush JM, et al. Detecting insomnia in patients with low back pain: accuracy of four self-report sleep measures. *BMC Musculoskelet Disord.* 2013(14):196. doi:10.1186/1471-2474-14-196
22. Lee EH. Review of the psychometric evidence of the perceived stress scale. *Asian Nurs Res (Korean Soc Nurs Sci).* 2012(6):121-7. doi:10.1016/j.anr.2012.08.004
23. Siegrist J, Dragano N, Nyberg ST, et al. Validating abbreviated measures of effort-reward imbalance at work in European cohort studies: the IPD-Work consortium. *Int Arch Occup Environ Health.* 2014(87):249-56. doi:10.1007/s00420-013-0855-z
24. Li J, Zhang W, Chen W, et al. Applications of the Chinese version of the primary care PTSD screen for DSM-5 (PC-PTSD-5) for children. *J Affect Disord.* 2019(254):109-14. doi:10.1016/j.jad.2019.05.021

**25.** Hitchon CA, Zhang L, Peschken CA, et al. Validity and Reliability of Screening Measures for Depression and Anxiety Disorders in Rheumatoid Arthritis. *Arthritis Care Res (Hoboken)*. 2020(72):1130-39. doi:10.1002/acr.24011

**26.** Williams JW, Jr., Pignone M, Ramirez G, et al. Identifying depression in primary care: a literature synthesis of case-finding instruments. *Gen Hosp Psychiatry*. 2002(24):225-37. doi:10.1016/s0163-8343(02)00195-0
